# Supplementary material
Source: publisher site journal article supplement (https://www.dovepress.com/article/268235)
Supplement: Supplementary file 1 [file get_supplementary_file.php]

## Supplement data

Supplementary Figure 1

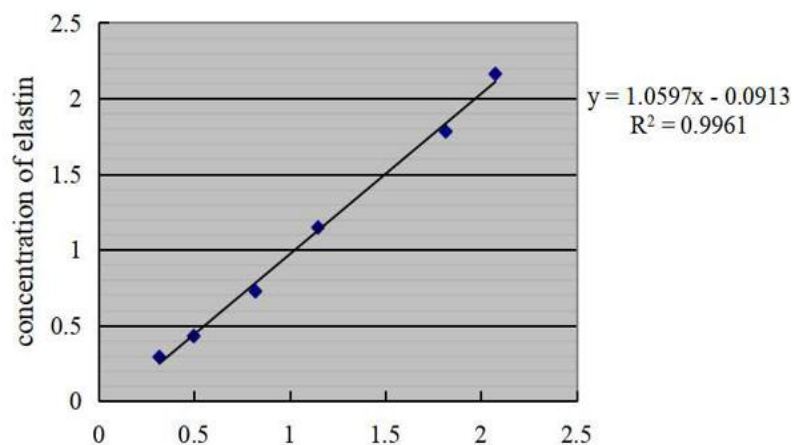

Supplementary Figure 1. Standard curves of elastin.

Supplementary Figure 2

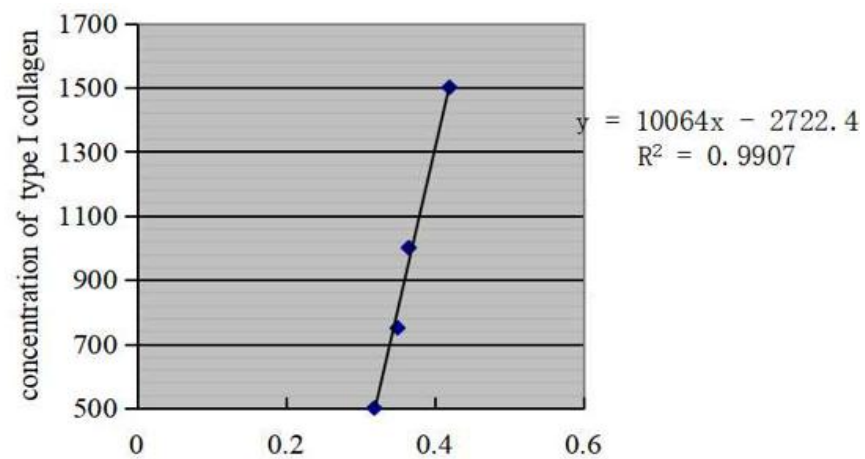

Supplementary Figure 2. Standard curves of type I collagen.
